# Supplementary material
Source: Springer Nature journal article supplement (https://www.springermedizin.de/resource/supplementary/13229_2013_164_MOESM5_ESM.pdf/9676162)
Supplement: MOESM5 [file 9676162]

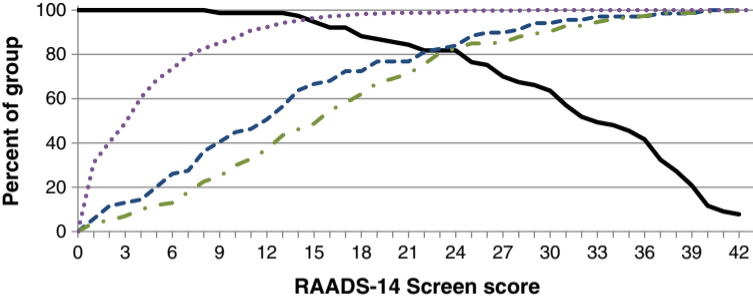

- Sensitivity
- - - Specificity in Other psychiatric disorders group
- . - Specificity in ADHD group
- . . . Specificity in Non-psychiatric group
